# Supplementary material for: Fluorescence, FTIR and 1H NMR studies of the inclusion complexes of the painkiller lornoxicam with β-, γ-cyclodextrins and their hydroxy propyl derivatives in aqueous solutions at different pHs and in the solid state
Source: Royal Society of Chemistry journal article supplement (doi:10.1039/c8nj03093f), 2018-01-01
Supplement: c8nj03093f1.pdf [file c8nj03093f1.pdf]

## Supplementary material

For

**Fluorescence, FTIR and  $^1\text{H}$  NMR Study of the inclusion complexes of the  
painkiller Lornoxicam with  $\beta$ - ,  $\gamma$ - Cyclodextrins and their hydroxy propyl  
derivatives in aqueous solution at different pH and in solid state**

Sathi Goswami,<sup>1</sup> Munna Sarkar\*<sup>1</sup>

*<sup>1</sup>Chemical Sciences Division, Saha Institute of Nuclear Physics, 1/AF Bidhannagar, Kolkata –  
700064, India*

---

\*: Corresponding Author

Phone: +91-33-2337-5345 to 49

Fax: +91-33-2337-4637

E-mail: [munna.sarkar@saha.ac.in](mailto:munna.sarkar@saha.ac.in)

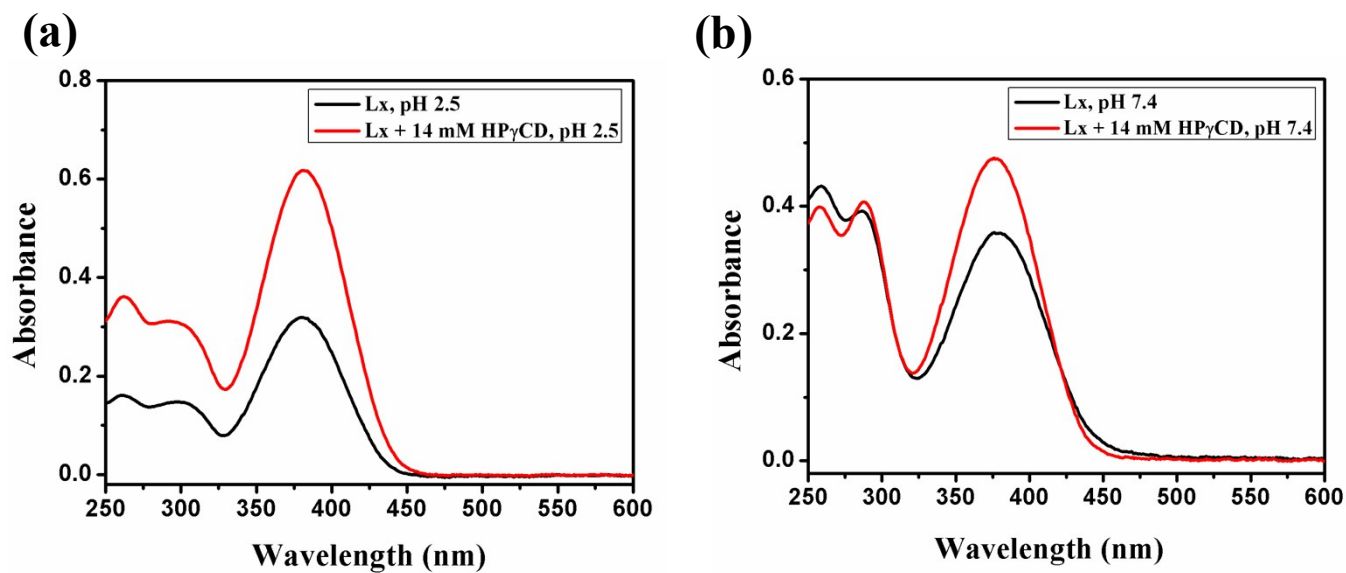

**Fig. S1.** Overlaid absorption spectra of (a) 30  $\mu$ M Lx (black) and 30  $\mu$ M Lx with 14 mM HP $\gamma$ CD (red) at pH 2.5; (b) 30  $\mu$ M Lx (black) and 30  $\mu$ M Lx with 14 mM HP $\gamma$ CD (red) at pH 7.4. The spectra were taken after one hour incubation of Lx and HP $\gamma$ CD. All experiments were done under the same experimental conditions.

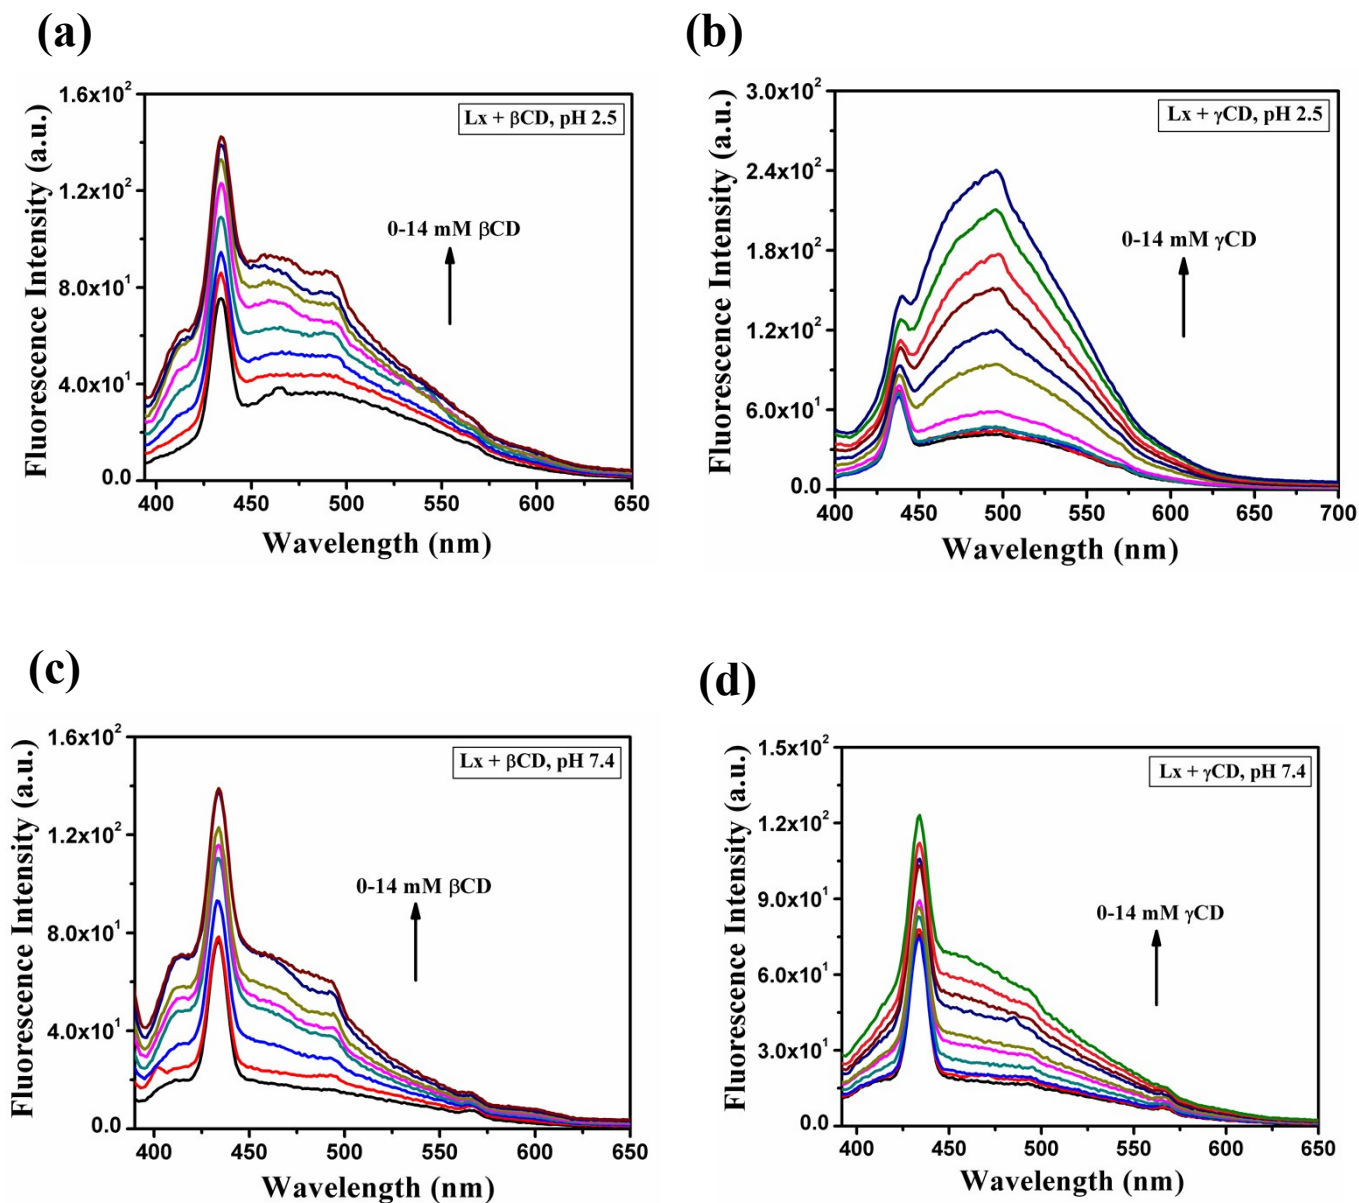

**Fig. S2.** Fluorescence emission spectra of 30  $\mu$ M Lx with increasing concentration of (a)  $\beta$ CD and (b)  $\gamma$ CD at pH 2.5 and with increasing concentration of (c)  $\beta$ CD and (d)  $\gamma$ CD at pH 7.4. The  $\lambda_{\text{exc}}$  and  $\lambda_{\text{em}}$  were set at 379 nm and 506 nm for pH 2.5 and 376 nm and 496 nm for pH 7.4 respectively. The concentrations of the CDs were varied from 0-14 mM. The spectra were taken

after one hour incubation of drug with corresponding CDs. All experiments were done under the same experimental conditions.

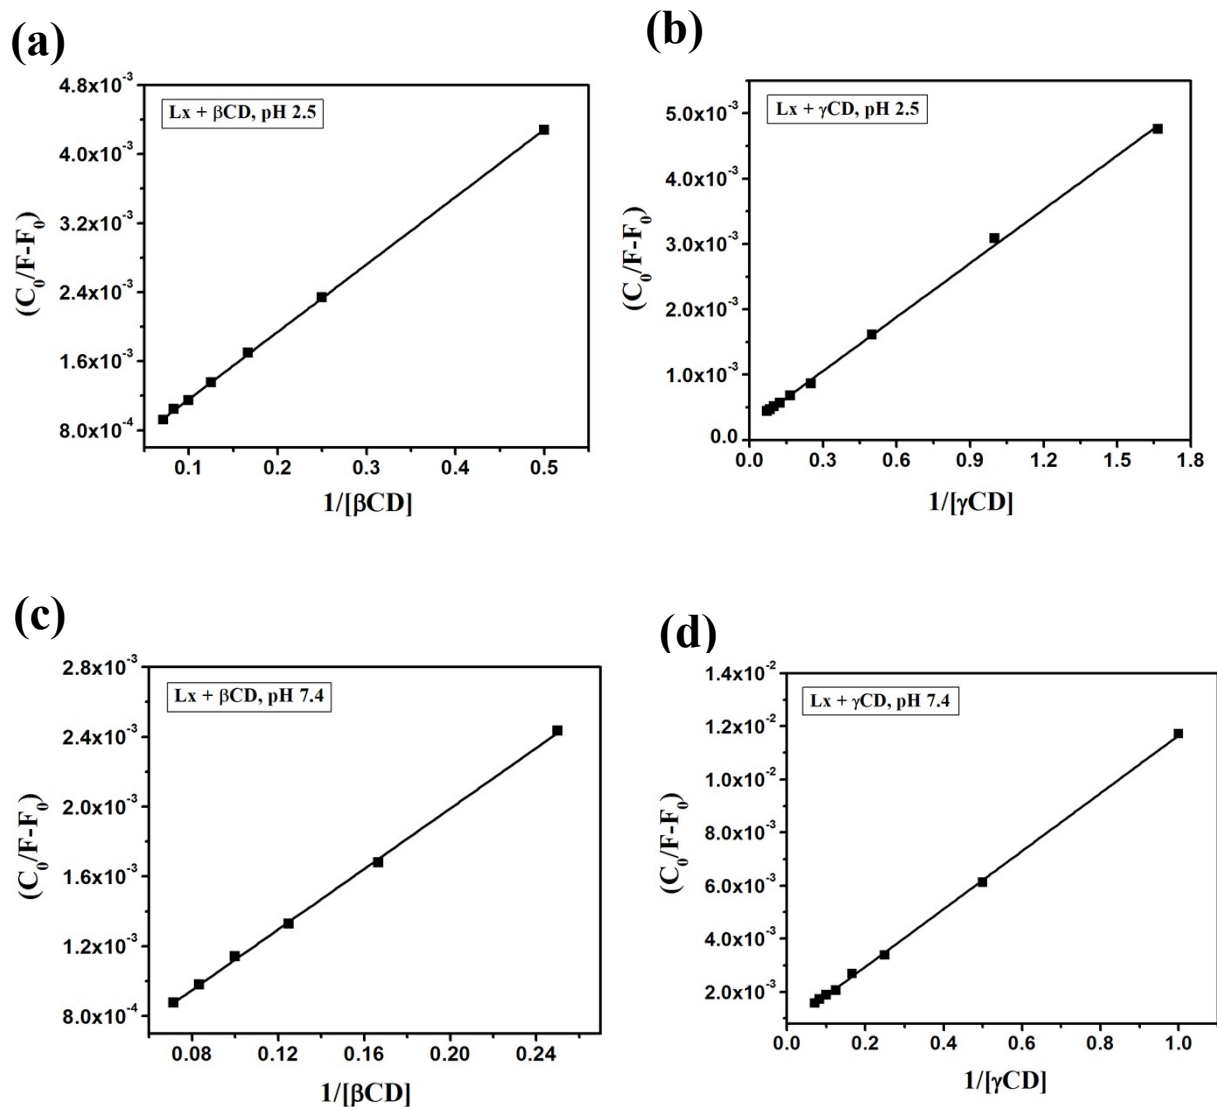

**Fig. S3.** Benesi-Hildebrand plot for 1:1 host:guest complex of (a) Lx and  $\beta$ CD (b) Lx and  $\gamma$ CD at pH 2.5 and for (c) Lx and  $\beta$ CD and (d) Lx and  $\gamma$ CD at pH 7.4. The concentration of drug was

kept at 30  $\mu$ M and the CDs were varied from 0-14 mM. All experiments were done under the same experimental conditions.

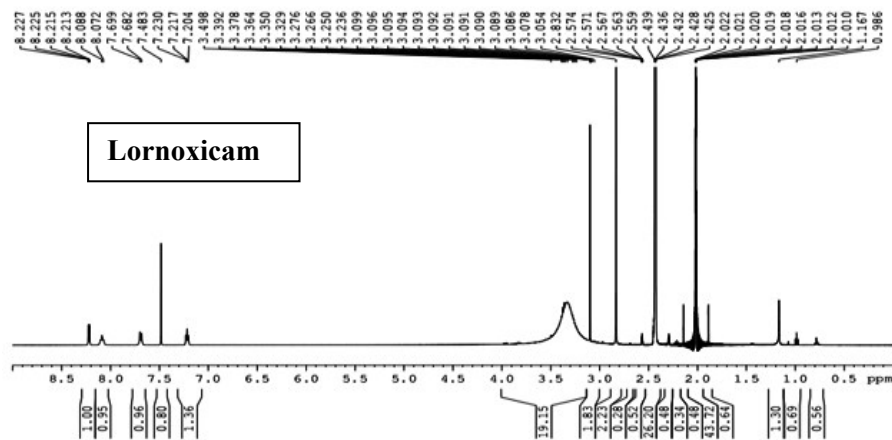

**Fig. S4.**  $^1\text{H}$  NMR spectra of Lornoxicam in DMSOd6.
